# Supplementary material for: Effect of thiram on rat kidney: inhibition of brush border membrane and antioxidant enzymes, diminution of antioxidant capacity, enhanced DNA damage and DNA-protein cross-linking
Source: Research Square preprint supplement (doi:10.21203/rs.3.rs-205480/v1), 2021-03-01
Supplement: Supplementary file 1 [file fa61e1b5828d034f6c4662e6.docx]

Highlights

- Thiram exposure induces oxidative stress in rat kidney.
- Thiram alters redox homeostasis and decreases antioxidant power (enzymatic and non-enzymatic).
- Thiram exposure decreases the activity of membrane bound enzymes and causes metabolic dysfunction.
- Thiram administration increases DNA fragmentation and DNA-protein crosslinking.
- Oral administration of thiram also causes histopathological modifications in rat kidney.
